# Supplementary material for: The histone methyltransferase Mixed-lineage-leukemia-1 drives T cell phenotype via Notch signaling in diabetic tissue repair
Source: PubMed Central journal article supplement (PMC11463913; doi:10.1172/jci.insight.179012), 2024-10-08
Supplement: jciinsight-9-179012-s244.pdf [file jciinsight-9-179012-s244.pdf]

Supplemental Figures:

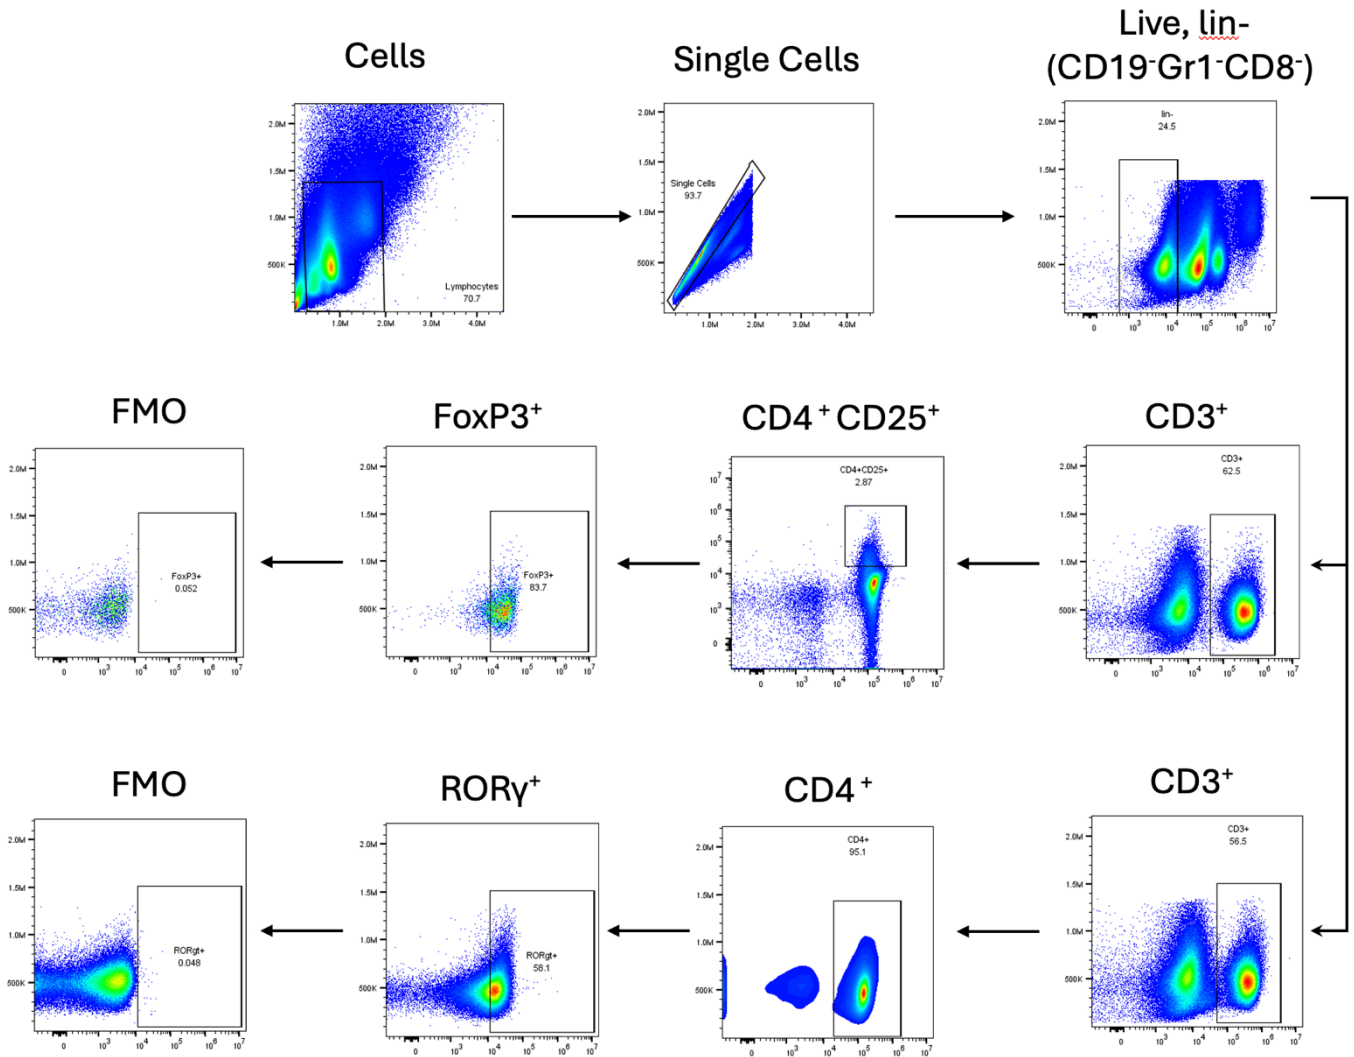

Supplemental Figure 1: Flow cytometry gating strategy for wound and splenic T cells.

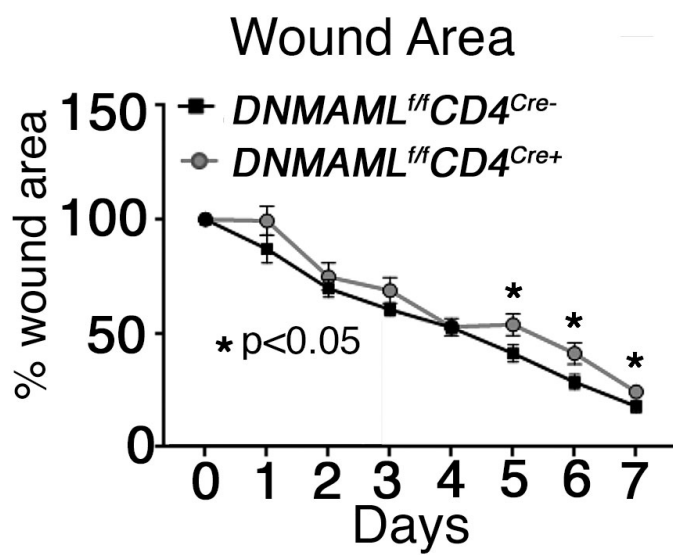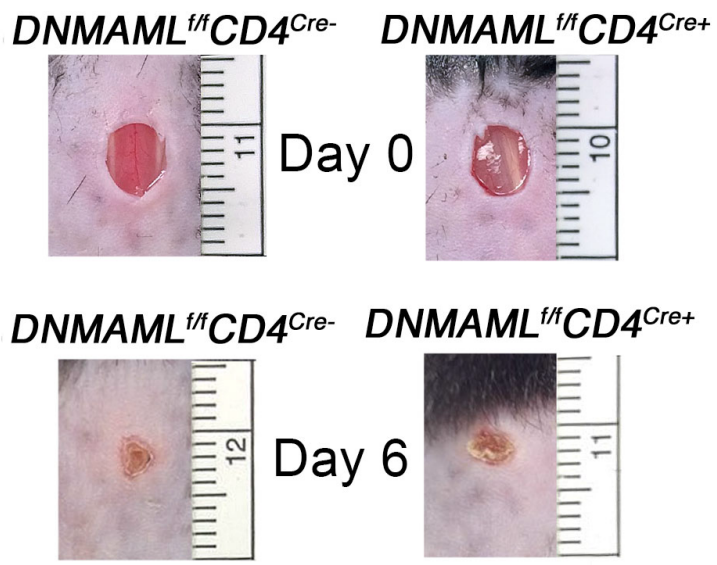

**Supplemental Figure 2:** Wound healing curve for mice (n=8) with loss of Notch signaling in  $CD4^+$  cells ( $DNMAAML^{f/f}CD4^{Cre+}$ ) compared to littermate controls (n=7).
